# Supplementary material for: Exploring the structure and function of Thermotoga maritima CorA reveals the mechanism of gating and ion selectivity in Co2+/Mg2+ transport
Source: PubMed Central journal article supplement (PMC3629940; doi:10.1042/bj20121745), 2013-04-12
Supplement: bj4510365add.pdf [file bj4510365add.pdf]

## SUPPLEMENTARY ONLINE DATA

**Exploring the structure and function of *Thermotoga maritima* CorA reveals the mechanism of gating and ion selectivity in  $\text{Co}^{2+}/\text{Mg}^{2+}$  transport**Nurhuda NORDIN, Albert GUSKOV, Terri PHUA, Newsha SAHAF, Yu XIA, Siyan LU, Hojjat ESHAGHI and Said ESHAGHI<sup>1</sup>

Division of Structural Biology and Biochemistry, School of Biological Sciences, Nanyang Technological University, Singapore 637551, Republic of Singapore

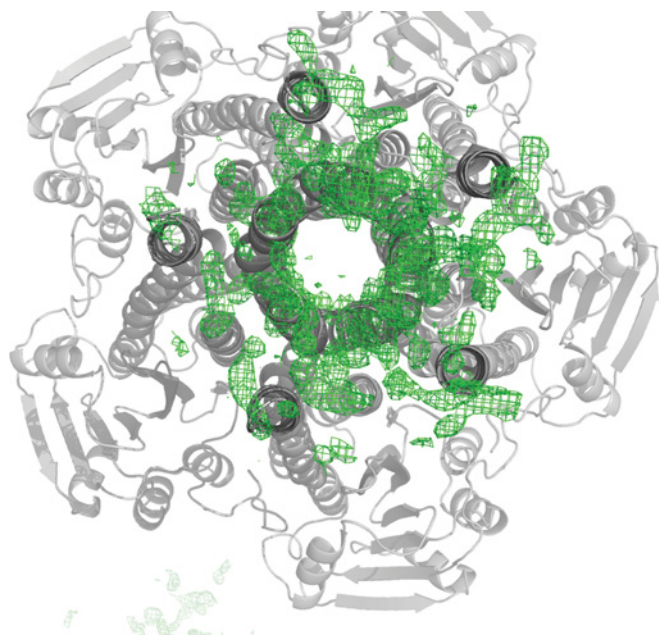**Figure S1 Electron density of the periplasmic loop**

Example of electron density ( $F_o - F_c$ ) in the area of periplasmic loop observed just after the molecular replacement and rigid body refinement before modelling of the loop.  $\sigma$  cut-off = 2.5

<sup>1</sup> To whom correspondence should be addressed (email said.eshaghi@ntu.edu.sg).

The structural co-ordinates reported for *Thermotoga maritima* CorA will appear in the PDB under accession code 4I0U.

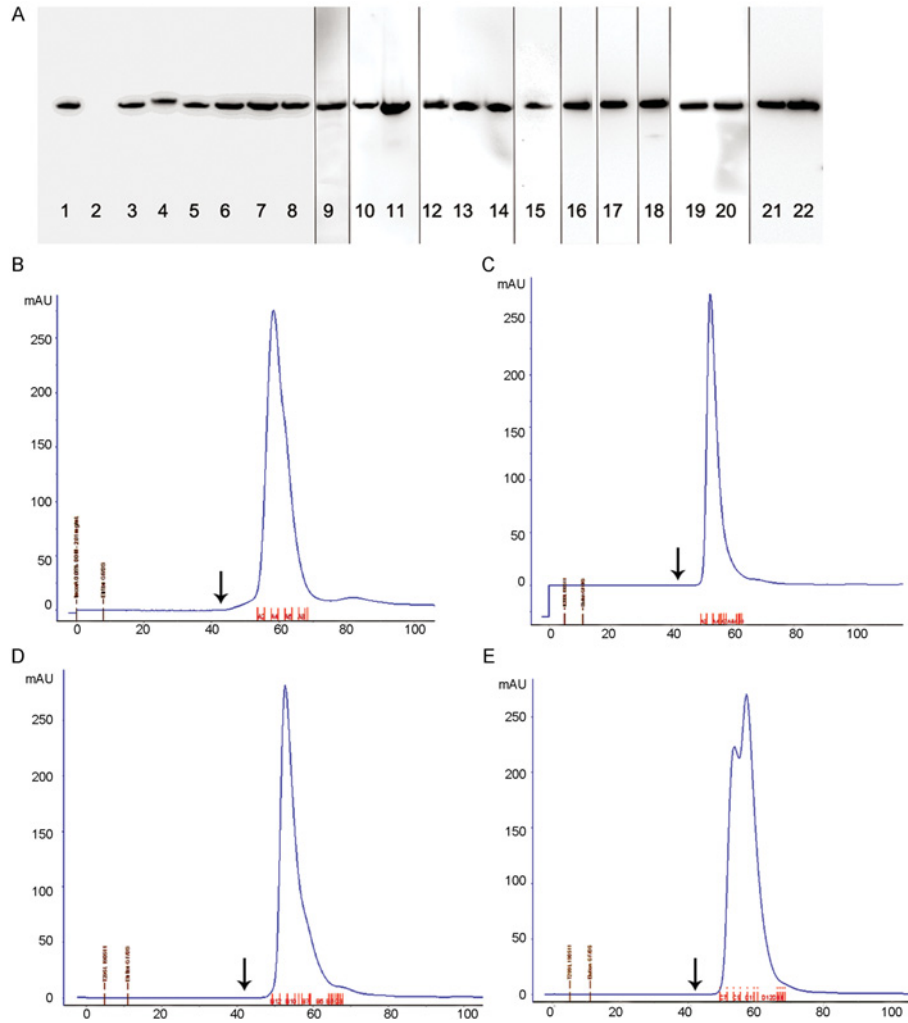

**Figure S2 Quality control of the mutations produced**

(A) Western blot of the whole cell protein expression of the different TmCorA mutants. Lane 1, wild-type TmCorA; lane 2, *corA*-less *E. coli*; lane 3, T295L; lane 4, T299L; lane 5, N288L; lane 6, N288L/T295L; lane 7, N288L/T299L; lane 8, N288L/T295L/T299L; lane 9, T305L; lane 10, T295M; lane 11, T299M; lane 12, T305S; lane 13, T295S; lane 14, T299S; lane 15, L294N; lane 16, D89K; lane 17, D89N; lane 18, H257A; lane 19, D253K; lane 20, D256A; lane 21, D253A/D256A; and lane 22, D253K/D256A. Black lines separate different Western blot membranes from each other. However, the expression level of the wild-type TmCorA was the same in all the experiments. (B–E) The gel-filtration profiles of (B) wild-type TmCorA, (C) N288L, (D) T295L and (E) T299L mutants. The void volume is indicated by an arrow.

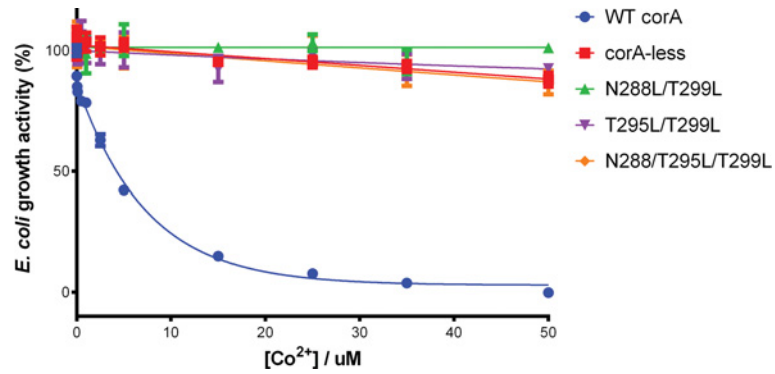

**Figure S3** Co<sup>2+</sup> transport assay of leucine double and triple mutants

The growth activity of TmCorA mutants was monitored in the presence of various Co<sup>2+</sup> concentrations. A reduction in growth activity upon Co<sup>2+</sup> concentration increase is indicative of the Co<sup>2+</sup> transport activity of the TmCorA variant. The wild-type TmCorA (WT corA) and the empty CorA-less pBAD vector (corA-less) were used as positive and negative controls respectively. The results are the means  $\pm$  S.D. of at least three independent experiments.

Received 20 November 2012/24 January 2013; accepted 21 February 2013  
Published as BJ Immediate Publication 21 February 2013, doi:10.1042/BJ20121745
